# Supplementary material for: Factors related to HPV vaccine uptake and 3-dose completion among women in a low vaccination region of the USA: an observational study
Source: Springer Nature journal article supplement (doi:10.1186/s12905-016-0323-5), 2016-07-22

# Influence of Physician Rec. & Age

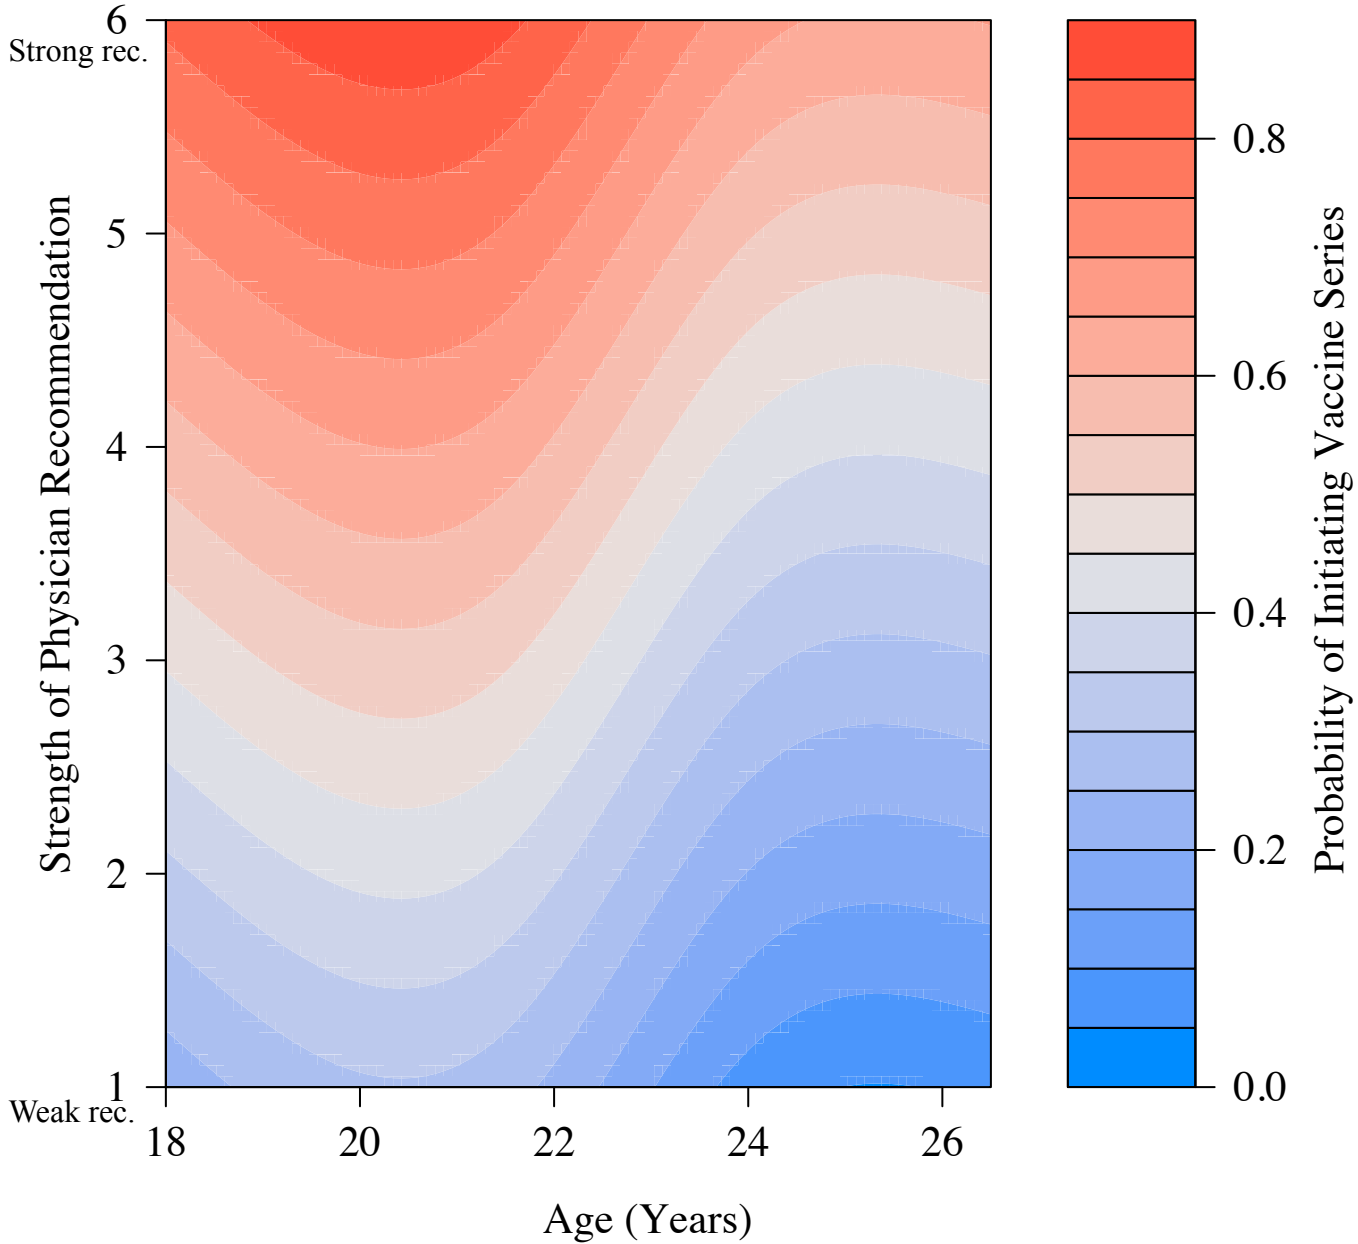

Supplement: MOESM1 [file 10514506]
